# Supplementary material
Source: HighWire-hosted journal article supplement (https://www.rcpjournals.org/highwire/filestream/13977/field_highwire_adjunct_files/0/Wallbridge_supplementary_material_S1.pdf)
Supplement: Wallbridge_supplementary_material_S1.pdf [file Wallbridge_supplementary_material_S1.pdf]

## Survey Questions

### Pre –pod introduction survey

- 1) What is your Job role?
  - Doctor
  - Nurse
  - Allied health professional
- 2) Are you able to take your breaks in a 12 hour shift?
  - Yes
  - No
- 3) How alert do you feel after your night shift?
  - Very alert
  - alert
  - Not alert
- 4) Are you aware of any designated rest areas in your department?
  - Yes
  - No

### Post-pod introduction survey

- 1) What is your Job role?
  - Doctor
  - Nurse
  - Allied health professional
- 2) Are you able to take your breaks in a 12 hour shift?
  - Yes
  - No
- 3) How alert do you feel after your night shift?
  - Very alert
  - alert
  - Not alert
  - Cannot comment
- 4) After using energy pods do you feel more able to drive?
  - Yes
  - No
  - Don't Know
- 5) Do you think the energy pod will help in wellbeing
  - Yes
  - No
  - Don't know
- 6) Would you recommend the sleep pod to a colleague?
  - Yes
  - No
  - Don't Know

Immediately post pod use survey

- 1) What is your job role?
- 2) How long did you use the energy pod for?
- 3) Do you feel more energised?
- 4) Do you feel more alert?
- 5) Can you highlight any negative points or areas which need to be improved?
- 6) Would you recommend the energy pod to a colleague?
- 7) Comments
